# Supplementary material
Source: publisher site journal article supplement (http://kjim.org/upload/media/kjim-2023-276-Supplementary-Table-5.pdf)
Supplement: Supplementary file 1 [file kjim-2023-276-Supplementary-Table-5.pdf]

**Supplementary Table 5. Interaction analysis between high income and high education for biologics use**

| Exposure                                             | Low education                         |                 | High education                        |      | OR for education group within strata of income group |
|------------------------------------------------------|---------------------------------------|-----------------|---------------------------------------|------|------------------------------------------------------|
|                                                      | Patient number with/without biologics | OR              | Patient number with/without biologics | OR   |                                                      |
| Low income                                           | 109/1,618                             | 1.0 (reference) | 55/807                                | 1.11 | 1.11                                                 |
| High income                                          | 47/654                                | 1.09            | 182/1,996                             | 1.68 | 1.54                                                 |
| OR for income group within strata of education group |                                       | 1.09            |                                       | 1.51 |                                                      |

AP, attributable proportion due to interaction; CI, confidence interval; OR, odds ratio; RERI, relative excess risk due to interaction; SI, synergistic index.

The measure of interaction on the additive scale (95% CI): RERI, 0.98 (0.56–1.41); AP, 0.92 (0.62–1.22); and SI, 3.27 (0.19–57.09).

Measure of interaction on the multiplicative scale: 7.39.
